# Supplementary material for: Seasonal induction of alternative principal pathway for rose flower scent
Source: PubMed Central journal article supplement (PMC4735289; doi:10.1038/srep20234), 2016-02-01
Supplement: srep20234-s1.pdf [file srep20234-s1.pdf]

## **Title: Seasonal induction of alternative principal pathway for rose flower scent**

**Authors:** Hiroshi Hirata<sup>1†</sup>, Toshiyuki Ohnishi<sup>2,3†</sup>, Kensuke Tomida<sup>2</sup>, Haruka Ishida<sup>2</sup>, Momoyo Kanda<sup>2</sup>, Miwa Sakai<sup>4</sup>, Jin Yoshimura<sup>5,6,7,8</sup>, Hideyuki Suzuki<sup>9</sup>, Takamasa Ishikawa<sup>10</sup>, Hideo Dohra<sup>3</sup>, Naoharu Watanabe<sup>5,8\*</sup>

### **Affiliations:**

<sup>1</sup> Graduate School of Science and Technology, Shizuoka University, 836 Ohya, Suruga-ku, Shizuoka 422-8529, Japan.

<sup>2</sup> Graduate School of Agriculture, Shizuoka University, 836 Ohya, Suruga-ku, Shizuoka 422-8529, Japan.

<sup>3</sup> Research Institute of Green Science and Technology, Shizuoka University, 836 Ohya, Suruga-ku, Shizuoka 422-8529, Japan.

<sup>4</sup> United Graduate School of Agricultural Science, Gifu University (Shizuoka University), 836 Ohya, Suruga-ku, Shizuoka 422-8529, Japan.

<sup>5</sup> Graduate School of Science and Technology, Shizuoka University, 3-5-1 Johoku, Naka-ku, Hamamatsu 432-8561, Japan.

<sup>6</sup> Department of Environmental and Forest Biology, State University of New York College of Environmental Science and Forestry, Syracuse, New York, 13210, USA.

<sup>7</sup> Marine Biosystems Research Center, Chiba University, Kamogawa, Chiba, 299-5502, Japan.

<sup>8</sup> Graduate School of Engineering, Shizuoka University, 3-5-1 Johoku, Naka-ku, Hamamatsu 432-8561, Japan.

<sup>9</sup> Kazusa DNA Research Institute, Kisarazu, Chiba 292-0818, Japan.

<sup>10</sup> Human Metabolome Technologies Inc., Tsuruoka, Yamagata 997-0052, Japan.

†These authors contributed equally to this article

\*Corresponding author: Naoharu Watanabe

e-mail: watanabe.naoharu@shizuoka.ac.jp;

phone/fax: +81-54-238-4870

Graduate School of Engineering, Shizuoka University, Hamamatsu 432-8561, Japan.

### **Contact Information:**

Hiroshi Hirata: xjtpt341@yahoo.co.jp; phone/fax: +81-54-238-4870

Toshiyuki Ohnishi: ohnishi.toshiyuki@shizuoka.ac.jp; phone/fax: +81-54-238-3082

Jin Yoshimura: [jin@sys.eng.shizuoka.ac.jp](mailto:jin@sys.eng.shizuoka.ac.jp); phone/fax: +81-54-238-4870

## **SUPPLEMENTARY INFORMATION**

### **SUPPLEMENTARY METHODS**

#### **Purification of RyPPDC**

Rose petals were ground in liquid nitrogen. The powder (approximately 100 g) was extracted with 1 l of buffer A [50 mM citrate buffer, pH 6.0, containing 1% polyoxyethylene (10) octylphenyl ether (Tryton X-100)] (Wako Pure Chemicals) in the presence of 100 g of PVPP (Polyclar 10, ISP Japan) and stirred for 2 h at 4°C. The buffer extracts were prepared from rose petals. After filtering with gauze, the filtrate was centrifuged (10,000 ×g, 30 min, 4°C). The supernatant (crude enzyme extract) was fractionated with ammonium sulfate. Proteins that precipitated in 20%–60% saturated ammonium sulfate were re-dissolved in approximately 40 ml of buffer B (20 mM potassium phosphate buffer, pH 7.5). This fraction was dialyzed in buffer B for 4 h at 4°C. The dialyzates were further purified by chromatography using a HiTrap DEAE FF column (5 ml, GE Healthcare) equilibrated with buffer C (20 mM potassium phosphate buffer, pH 7.5, containing 1 mM DTT and 1 mM TPP) and eluted with a linear 0–1.5 M NaCl gradient in the same buffer. Ammonium sulfate was added to the eluted fraction to a concentration of 20%, and the solution was applied to a HiTrap Phenyl HP column (5 ml, GE Healthcare) equilibrated with buffer D (50 mM potassium phosphate buffer, pH 7.0, containing 1 M ammonium sulfate, 1 mM DTT, and 1 mM TPP). The proteins were eluted in buffer D without ammonium sulfate in a stepwise manner: 20% buffer D for eight column volumes (CV), 35% buffer D for 5 CV, 50% buffer D for 10 CV, and 100% buffer D for 5 CV. Further purifications were performed using Superdex 200 14/350 column chromatography (CV 70 ml, GE Healthcare) equilibrated with buffer E (50 mM potassium phosphate buffer, pH 7.0, containing 0.15 M NaCl, 1 mM DTT, and 1 mM TPP). The resulting proteins were separated by SDS-PAGE (7.5% polyacrylamide gel) and visualized by Ag staining (Sil-Best Stain One, Nacalai Tesque, Kyoto, Japan). Peptide sequences were analyzed by Nano-LC-MS/MS.

#### **Preparation and determination of peptide sequences by Nano-LC-MS/MS**

Purified proteins were separated by SDS-PAGE, and the major bands were excised from the gel and destained with wash solution [25 mM NH<sub>4</sub>HCO<sub>3</sub>/acetonitrile (1:1 v/v)]. Proteins in the gel pieces were reduced and alkylated by respective treatment with 10 mM dithiothreitol/50 mM NH<sub>4</sub>HCO<sub>3</sub> (45 min at 56°C) and 55 mM iodoacetoamide/50 mM NH<sub>4</sub>HCO<sub>3</sub> (30 min at room temperature). After sequential washings with wash

solution and acetonitrile, the proteins were digested with trypsin (sequencing grade modified, Promega) at 37°C overnight. The tryptic peptides were extracted from the gel pieces with 50% acetonitrile containing 1% formic acid, and the extracts were pooled and concentrated in a vacuum centrifuge. The dissolved sample was centrifuged at 20,000 ×g for 10 min at room temperature, and the supernatant was subjected to LC-MS/MS analysis. Peptide assignments were performed using an LC-ESI-LIT-q-TOF mass spectrometer equipped with a Nano Frontier eLD System (Hitachi High-Technologies, Tokyo, Japan) and a nano-flow HPLC, NanoFrontier nLC (Hitachi High-Technologies). The LIT-TOF and CID modes were used for MS detection and peptide fragmentation, respectively. The trypsin-treated sample (10 µl) was injected, and the peptides were trapped on a C18 column, Monolith Trap (50 µm × 150 mm, Hitachi High Technologies). Peptide separation was achieved using a packed nano-capillary column (capillary-Ex nano mono cap, 0.05 × 150 mm, GL Science, Japan) at a flow rate of 200 nl/min. The separated peptides were then ionized with a capillary voltage of 1,700 V. The ionized peptides were detected at a detector potential TOF of 1,850 V. The peptides were eluted using an acetonitrile gradient (A: 2% acetonitrile containing 0.1% formic acid; B: 98% acetonitrile containing 0.1% formic acid; 0 min with A = 98%, B = 2%, followed by 60 min with A = 60%, B = 40%). All peptide mass data were analyzed by using Peaks software (Bioinformatics Solutions Inc.) and the MASCOT database (Matrix Science).

#### **Analyses of gene expression by qRT-PCR**

Total RNA was extracted from rose petals using the RNeasy Plant Mini Kit (Qiagen) according to the manufacturer's instructions. For qRT-PCR, cDNA was synthesized using the Quanti-Tect Reverse Transcription Kit (Qiagen). Averaged mRNA expression was normalized to β-actin expression. Serial dilutions of a standard solution were included for each gene to generate a standard curve and allow calculation of the input amount of cDNA for each gene. A LightCycler 480 system was incubated at 95°C for 10 min to activate the FastStart Taq DNA polymerase. The run conditions were 60 cycles at 95°C for 10 s, 55°C for 10 s, and 72°C for 10 s. Melting curves of each amplified gene were created to obtain PCR efficiency. Each gene was quantified on the basis of three independent reverse transcription reactions.

#### **SUPPLEMENTARY TABLE AND FIGURE LEGENDS**

##### **Supplementary Table 1. LC-MSMS analysis of peptides derived from RyPDC**

**purified from rose petals.** C[1] and M[2] mean carbamidomethylation of cysteine and oxidation of methionine, respectively.

**Supplementary Table 2. Homologs involved in heat response and transcription factors for 2PE synthesis obtained by NGS analysis of rose flowers.** S-flower/W-flower ratio was calculated by the average score of RPKM values.

**Supplementary Table 3. Primers used in this study.**

**Supplementary Fig. 1. Purification and heterologous expression of RyPPDC.** (a) Purification of RyPPDC protein from rose petals. (b) SDS-PAGE analysis of samples obtained from each purification step shown in (a). The proteins were extracted from rose petals harvested in S-flowers and separated on a 7.5% polyacrylamide gel. M, protein molecular marker purchased from Bio-Rad Ltd. The lanes were loaded with crude extracts (1), the ammonium sulfate precipitate (20%–60%) (2), a Hi-Trap DEAE FF fraction (3), a Hi-Trap Phenyl HP fraction (4), and the Superdex 200 p.g. fraction (5). (c) SDS-PAGE analysis of heterologously expressed RyPPDC for kinetics analysis. (d) Total ion traces from GC-MS analysis of PPA metabolites produced by recombinant RyPPDC extracted from insect cells.

**Supplementary Fig. 2. Seasonal changes and relationship between [<sup>2</sup>H<sub>7</sub>]-2PE level and day length in *R. x hybrida* ‘Yves piaget’.** (a) Seasonal changes in the average day length in Mishima City. All of the data were obtained from the National Astronomical Observatory of Japan. (b) The relationship between the [<sup>2</sup>H<sub>7</sub>]-2PE ratio and average day length.

**Supplementary Fig. 3. Seasonal changes in flower growth and floral scent emission in *R. x hybrida* ‘Yves piaget’.** (a) Seasonal change in the number of petals (closed circle), in total petal weight (opened circle) from a flower and in average temperature in Mishima city (red line). There was significant difference ( $P < 0.05$ ) in the number of petals between W-flowers ( $51.0 \pm 1.9$ ,  $n=5$ , means  $\pm$  SE) and S-flowers ( $57.7 \pm 1.4$ ,  $n=5$ , means  $\pm$  SE). In contrast, the total petal weight is significantly lower in S-flower ( $7.13 \pm 0.56$  g, means  $\pm$  SE,  $n=5$ , from June to October) than in W-flowers ( $11.90 \pm 0.88$  g, means  $\pm$  SE,  $n=5$ , from November to April) ( $P < 0.01$ ). That means petal size was lower in S-flowers (high temperature season) than W-flowers (low temperature season). (b) Proportions of emitted volatiles collected in W- and S-flower. Emitted volatiles were

collected by the dynamic head space sampling. (c) Amount of emitted 2PE in W- and S-flower. Statistically not significantly different between experiments. Error bars represent SE (n=4 in W-flower and n=15 in S-flower).

**Supplementary Fig. 4. Phylogenetic tree of plant PDC and rose PPDC.** The alignment was constructed using ClustalW 1.81. Abbreviations and accessions are as follows: ZmPDC (PDB: 1ZPD); *Zymomonas mobilis*, OsPDC1, 2 (AAA68290, A2XFI3); *Oryza sativa*, CsPDC (AAZ05069); *Citrus sinensis*, RyPDC (AB669188; *Rosa x hybrida* ‘Yves Piaget’), RyPPDC (LC012788; *R. x hybrida* ‘Yves Piaget’), PhPDC1, 2 (AY928612, AAX33299); *Petunia x hybrid*, PaPDC (ABZ79223); *Prunus armeniaca*, FaPDC (AAL37492); *Fragaria x ananassa*, AtPDC1-4 (AT4G33070, AT5G54960, AT5G01330, AT5G01320); *Arabidopsis thaliana*. ZmPDC was included in the alignment as an outgroup. Based on the alignment, a molecular phylogenetic tree was constructed by the neighbor-joining (NJ) method. The statistical significance of the NJ tree topology was evaluated by bootstrap analysis with 1,000 iterations. The tree was drawn with MEGA version 6<sup>49,50</sup>.

**Supplementary Fig. 5. Transcriptional analysis of RyPPDC in various organs of *R. x hybrida* ‘Yves Piaget’.** Total RNA was extracted from S-flower tissues.  $\beta$ -Actin was used as a housekeeping gene control. Expression levels in petal were set to 1.0. Error bars represent SE (n = 3).

**Supplementary Fig. 6. Comparisons of endogenous metabolites in rose flowers harvested in W- and S-flower.** (a) Schematic biosynthetic pathway to 2PE from dehydroshikimic acid. (b) Metabolites analysis in rose cut flower, W-flower (White box) and S-flower (Gray box). Error bars represent SE (n = 3). Symbols indicate  $P < 0.05$  (\*) and  $P < 0.01$  (\*\*).

#### SUPPLEMENTARY REFERENCES

49. Tamura K, *et al.* MEGA5: molecular evolutionary genetics analysis using maximum likelihood, evolutionary distance, and maximum parsimony methods. *Mol Biol Evol.* **28**, 2731-2739 (2011).
50. Hall BG. Building phylogenetic trees from molecular data with MEGA. *Mol Biol Evol.* **30**, 1229-1235 (2013).

## SUPPLEMENTARY TABLES

Supplementary Table 1

| Amino acid sequence   | Ion Score | Charge | Observed mass<br><i>m/z</i> |
|-----------------------|-----------|--------|-----------------------------|
| AILVQPDR              | 57.4      | 2+     | 456.2814                    |
| AVKPVMVGGPK           | 83.2      | 1+     | 1081.632                    |
| AVKPVM[2]VGGPK        | 78.0      | 1+     | 1097.627                    |
| DFLLGLAK              | 54.9      | 2+     | 438.7758                    |
| ELLEWGSR              | 40.7      | 2+     | 495.2708                    |
| IFVPDGHPLK            | 82.5      | 1+     | 1121.623                    |
| ILHHTIGLPDFSQELR      | 99.0      | 3+     | 626.0283                    |
| MGLEAAVEAAAFLNK       | 97.2      | 1+     | 1662.829                    |
| M[2]GLEAAVEAAAFLNK    | 93.9      | 2+     | 560.6279                    |
| NWNYTGLVDAIHNGEGK     | 75.4      | 3+     | 629.9933                    |
| VNVLFQHIQK            | 71.0      | 3+     | 409.2527                    |
| VRC[1]EEELIEAIETANGPK | 63.4      | 3+     | 686.6997                    |
| VSAANSRPPNPQ          | 11.6      | 2+     | 619.3344                    |
| VTIGNGPAFGC[1]VLMK    | 96.9      | 2+     | 782.4313                    |

## 1 Supplementary Table 2

2

---

| Contig ID      | Length | Description                                                                                                  | Identity | E-value | S-flower           |              |
|----------------|--------|--------------------------------------------------------------------------------------------------------------|----------|---------|--------------------|--------------|
|                |        |                                                                                                              |          |         | /W-flower<br>ratio | Significance |
| Contig00003111 | 783    | EOBI [ <i>Petunia x hybrida</i> ] (AGC00813)                                                                 | 65%      | 6e-62   | 1.94               | $P < 0.05$   |
| Contig00008879 | 766    | Emission of benzenoids III [ <i>Petunia x hybrida</i> ] (ADK12668)                                           | 64%      | 2e-106  | 0.64               | $P < 0.05$   |
| Contig00041094 | 1188   | RecName: Full=Protein ODORANT1; AltName: Full=MYB-like protein ODO1<br>[ <i>Petunia x hybrida</i> ] (Q50EX6) | 53%      | 3e-86   | 7.98               | $P < 0.05$   |

---



## 3 Supplementary Table 3

| Primers                           | Sequence (5'–3')                       |
|-----------------------------------|----------------------------------------|
| <u>3'-RACE</u>                    |                                        |
| <i>RyPPDC_3'-RACE</i>             | GCIATHCAYAAAYGGIGARGG                  |
| <u>5'-RACE</u>                    |                                        |
| <i>RyPPDC_5'-RACE</i>             | (5'-Phos)-GGTGGGCGGCTGTTGGCAGCAGAAACCC |
| <u>Full length</u>                |                                        |
| <i>RyPPDC_Forward</i>             | ATGGAACCTTCTACTCA                      |
| <i>RyPPDC_Reverse</i>             | CTACTGAGGATTTGGAGGTC                   |
| <u>Subcloning to pENTR/D-TOPO</u> |                                        |
| <i>RyPPDC_Forward</i>             | CACCATGGAACCTTCTACAC                   |
| <i>RyPPDC_Reverse</i>             | CTGAGGATTTGGAGGTCGGC                   |
| <u>qRT-PCR</u>                    |                                        |
| <i>AADC_Forward</i>               | CCCCGAAGAGTTCAGGAAAC                   |
| <i>AADC_Reverse</i>               | GGTTCAACTCGGCTTAGAACTG                 |
| <i>RyAAAT3_Forward</i>            | TGGATGGCGGCTTGGTTGGT                   |
| <i>RyAAAT3_Reverse</i>            | TGAAGGTTGCAGGACCGCCC                   |
| <i>RyPPDC_Forward</i>             | AGCTCAGAAAGATGAACCTCTT                 |
| <i>RyPPDC_Reverse</i>             | ACAATTCTCAGGGAGGCGG                    |
| <i>RyActb_Forward</i>             | CTGAGGCTCCTCTTAACCCC                   |
| <i>RyActb_Reverse</i>             | CATACATAGCGGGCACATTG                   |
| <i>PAR_Forward</i>                | GACTTTGGCGGAGGATGCTG                   |
| <i>PAR_Reverse</i>                | AGCGTTGGCTGTAACAGAGG                   |

## 5 Supplementary Figures

**a**

| Step              | Total protein (mg) | Specific activity (U/mg protein) | Total activity (U) | Purification fold | Recovery (%) |
|-------------------|--------------------|----------------------------------|--------------------|-------------------|--------------|
| Crude extracts    | 739                | 0.91                             | 670                | 1.0               | 100          |
| Ammonium sulfate  | 624                | 0.22                             | 137                | 0.2               | 84           |
| DEAE sepharose    | 17.2               | 1.20                             | 21.1               | 1.4               | 2.3          |
| Phenyl sepharose  | 1.88               | 4.20                             | 7.9                | 4.7               | 0.25         |
| Superdex 200 p.g. | 0.039              | 47                               | 1.8                | 52                | 0.005        |

U: nmol/h

**b**

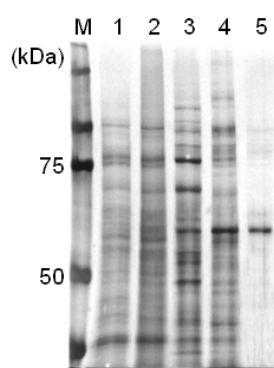

**c**

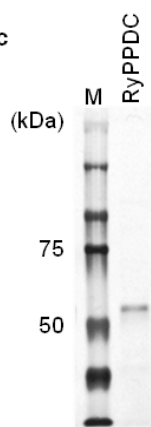

**d**

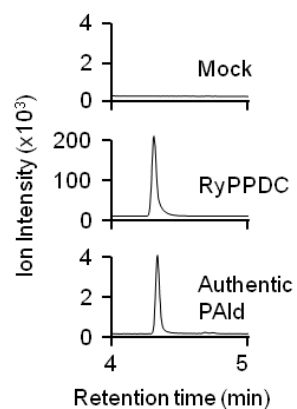

6

7 Supplementary Fig. 1

8

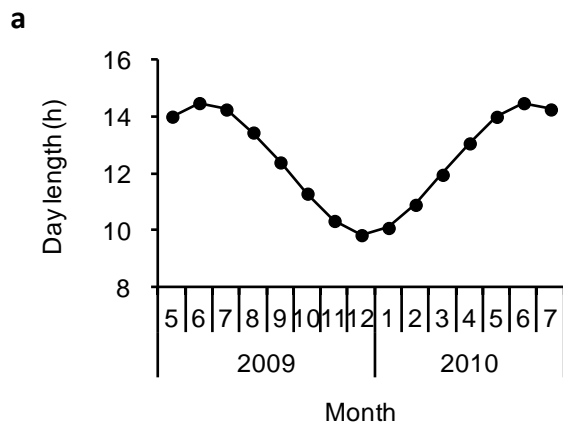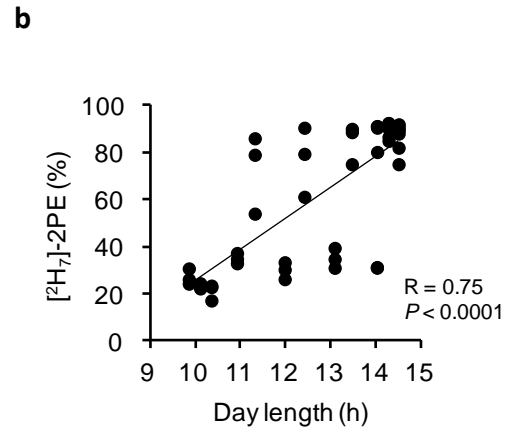

9

10 Supplementary Fig. 2

11

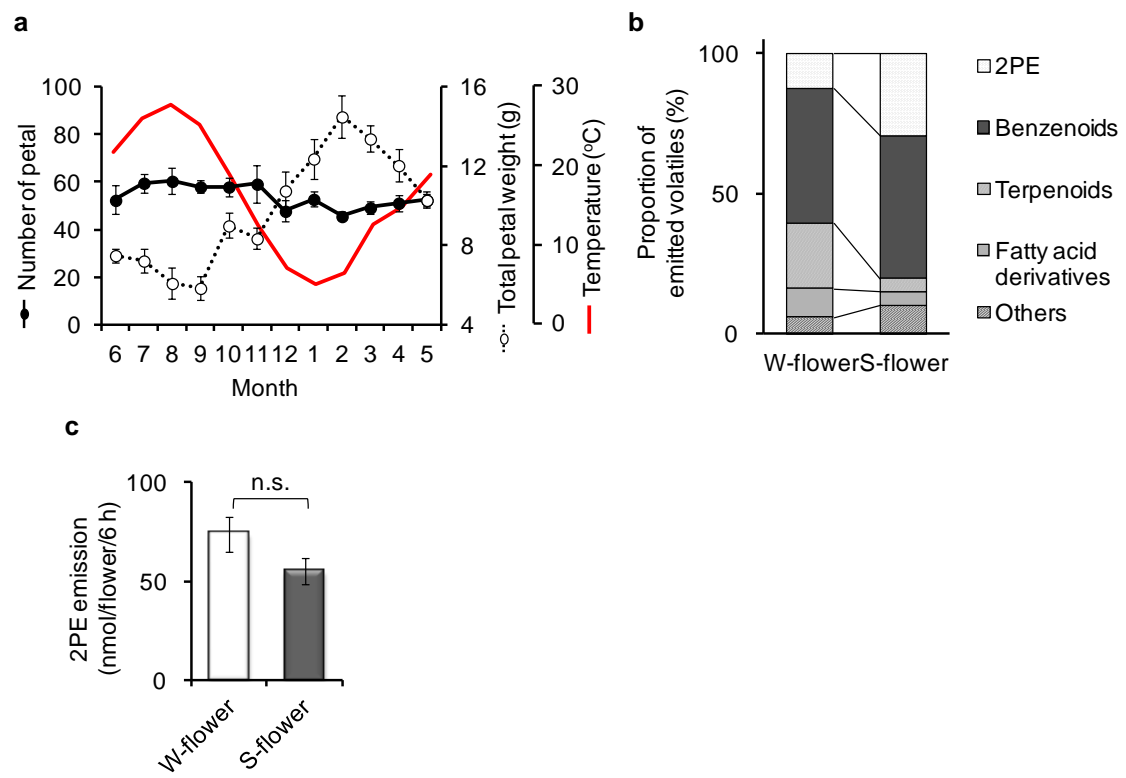

12

13 Supplementary Fig. 3

14

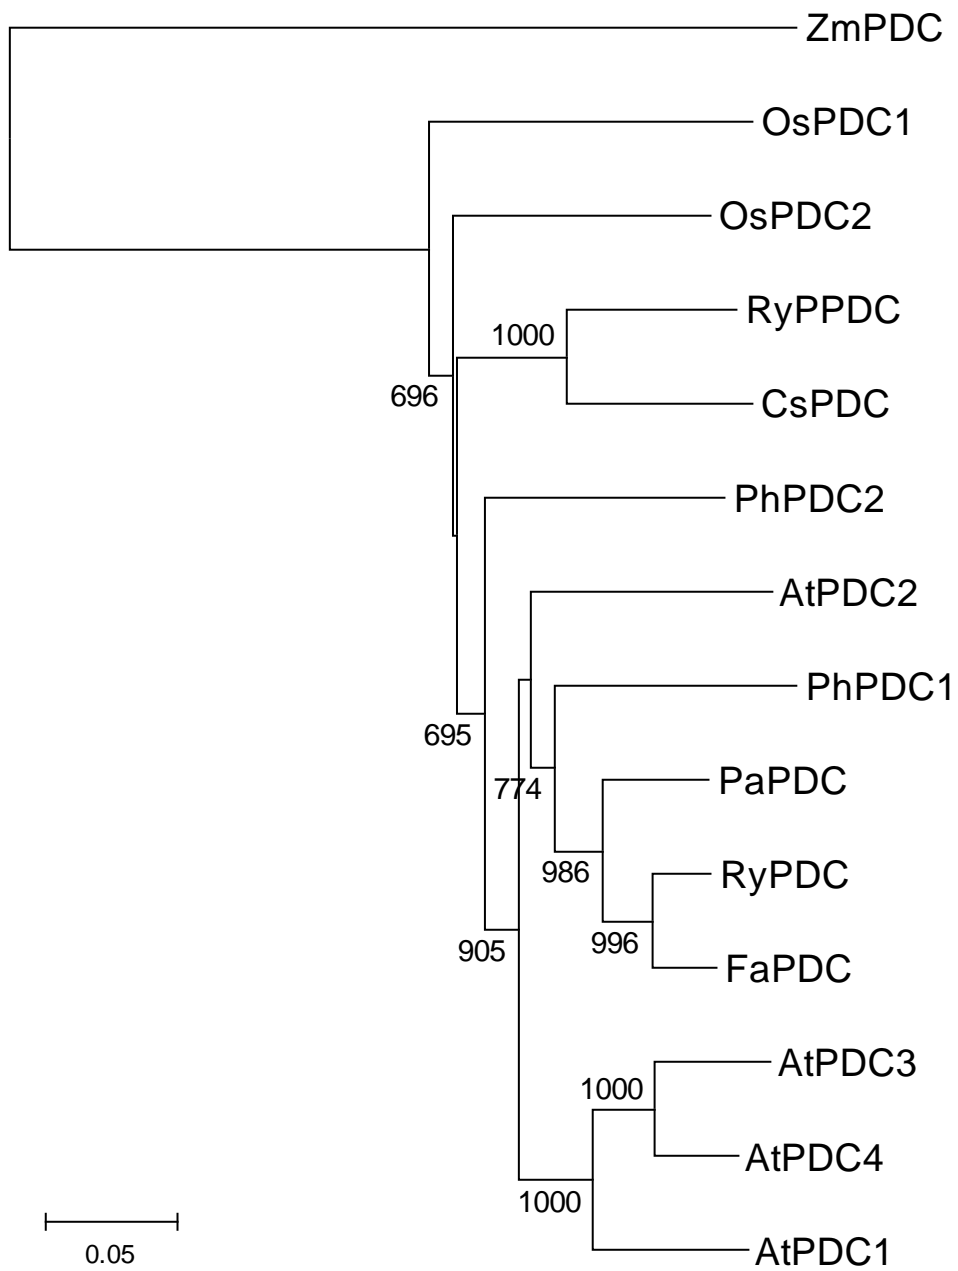

0.05

15

16 Supplementary Fig. 4

17

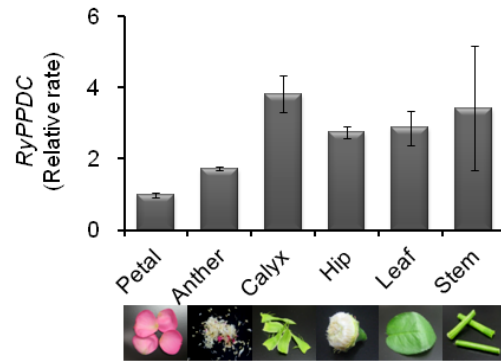

18

19 Supplementary Fig. 5

20

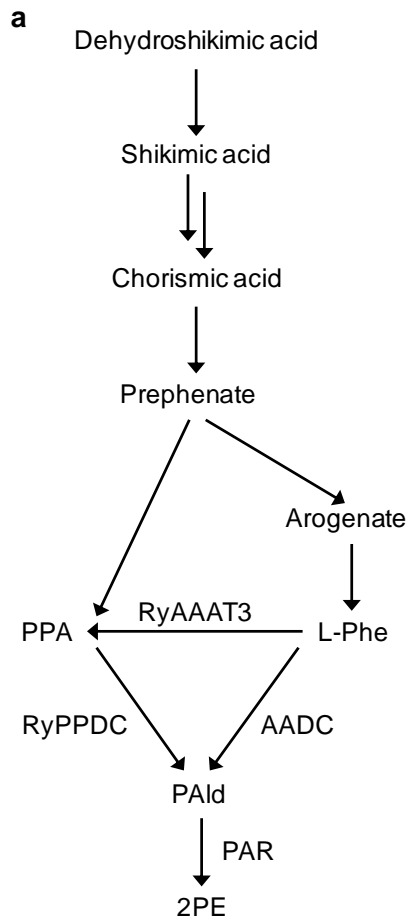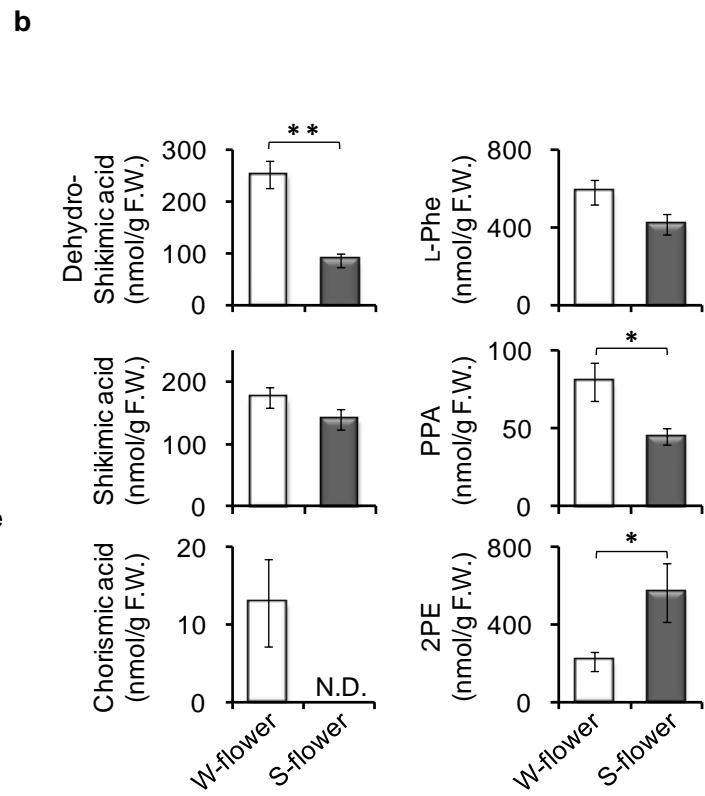

21

22 Supplementary Fig. 6
